# Supplementary material for: Entrepreneurial Fundraising Strategies and the Gender Gap: Theory and Evidence from Equity Crowdfunding
Source: Atypon-hosted journal article supplement (doi:10.1287/mnsc.2024.06658), 2025-08-12
Supplement: mnsc.2024.06658.sm1.pdf [file mnsc.2024.06658.sm1.pdf]

# Entrepreneurial Fundraising Strategies and the Gender Gap: Theory and Evidence from Equity Crowdfunding

May 2025

Thomas Hellmann, Ilona Mostipan, and Nir Vulkan

## Online Appendix

### Table of Contents

|                                                                   |    |
|-------------------------------------------------------------------|----|
| Table A1: Oster analysis for coefficient stability.....           | 2  |
| Table A2: Reporting of additional coefficients.....               | 4  |
| Table A3: Valuations and Investor Stakes .....                    | 7  |
| Table A4: Investments by investors with unknown gender.....       | 8  |
| Table A5. Interactions with other founder characteristics .....   | 9  |
| Table A6. Post-SEEDRS performance .....                           | 12 |
| Table A7. Number of investors.....                                | 16 |
| Table A8. Average investment amounts.....                         | 18 |
| Table A9. Determinants of repeat campaigns .....                  | 20 |
| Table A10. Dropping repeat campaigns.....                         | 21 |
| Table A11. Alternative Measure of Entrepreneurial Experience..... | 24 |
| Table A12. Alternative Measure of Education .....                 | 26 |
| Table A13. Alternative GPT data.....                              | 28 |
| Table A14. Bag of Words Analysis .....                            | 31 |
| Table A15. Adding currency indicator .....                        | 34 |
| Table A16. Adding rejected amounts.....                           | 36 |
| Table A17. Oaxaca-Blinder Decomposition .....                     | 37 |
| Theory Appendix .....                                             | 38 |
| Model derivation.....                                             | 38 |
| Benchmark propositions .....                                      | 39 |
| Linking the model to gender and data.....                         | 40 |
| Model extension with differential market depth.....               | 41 |

## Table A1: Oster analysis for coefficient stability

### Panel A - Table A1: Coefficient Stability for Table 3

All A1 tables report the coefficients associated with the main independent variables, their standard errors, and the delta parameter from Oster (2019) associated with each of these coefficients under increasingly strict specifications. We use the standard assumption of  $R_{max} = \min\{1.3 \cdot R_{sq}, 1\}$ . Values for delta above 1 suggest the coefficients are not sensitive to unobservable information.

Panel A is based on Table 3. All regressions include the following controls: Team Size, Prior SEEDRS, SEIS/EIS, Sector and Quarter. The first two columns make use of the full sample. Founder characteristics are defined as Entrepreneurial Experience, Managerial Experience, and Education. The remaining columns are based on the restricted sample of successful campaigns. The fifth column includes the controls from the fourth column, plus the controls for product and delivery mode. The last column shows the full specification which also includes GPT Growth and GPT Capital.

|                            | Base                | + Founder Characteristics | Base (Restricted Sample) | + Founder Characteristics | + Product and Delivery FEs | Full Specification  |
|----------------------------|---------------------|---------------------------|--------------------------|---------------------------|----------------------------|---------------------|
| Panel A: Continuous Models |                     |                           |                          |                           |                            |                     |
| Female Share               | -0.380**<br>(-2.76) | -0.347**<br>(-2.53)       | -0.678**<br>(-3.08)      | -0.588**<br>(-2.71)       | -0.610**<br>(-2.90)        | -0.614**<br>(-2.81) |
| Delta                      | -                   | 1.139                     | -                        | 1.049                     | 1.340                      | 1.951               |
| Observations               | 767                 | 767                       | 333                      | 333                       | 333                        | 329                 |
| R-squared                  | 0.358               | 0.371                     | 0.367                    | 0.387                     | 0.392                      | 0.411               |
| Panel B: Dummy Models      |                     |                           |                          |                           |                            |                     |
| All Female                 | -0.280*<br>(-1.81)  | -0.266*<br>(-1.72)        | -0.533**<br>(-2.18)      | -0.427*<br>(-1.65)        | -0.439*<br>(-1.83)         | -0.451*<br>(-1.82)  |
| Delta                      | -                   | 1.910                     | -                        | 0.909                     | 1.026                      | 1.536               |
| Mixed-Gender               | -0.320**<br>(-2.28) | -0.283**<br>(-2.12)       | -0.445<br>(-1.64)        | -0.402*<br>(-1.67)        | -0.417*<br>(-1.72)         | -0.412*<br>(-1.65)  |
| Delta                      | -                   | 0.920                     | -                        | 1.983                     | 3.010                      | 3.291               |
| Observations               | 767                 | 767                       | 333                      | 333                       | 333                        | 329                 |
| R-squared                  | 0.360               | 0.374                     | 0.367                    | 0.394                     | 0.399                      | 0.417               |

**Panel B - Table A1: Coefficient Stability for Table 5: Total Effects**

Panel B is based on Columns 1 and 2 of Table 5, concerning total effects. All regressions include the following controls: Team Size, Prior SEEDRS, SEIS/EIS, Sector and Quarter. The second column adds founder characteristics, defined as Entrepreneurial Experience, Managerial Experience, and Education. The third column includes the controls from the second column, plus the controls for product and delivery mode. The last column shows the full specification that also includes GPT Growth and GPT Capital.

|                            | Base                 | + Founder Characteristics | + Product and Delivery FEs | Full Specification  |
|----------------------------|----------------------|---------------------------|----------------------------|---------------------|
| Panel A: Continuous Models |                      |                           |                            |                     |
| Female Share               | -0.769***<br>(-3.51) | -0.685**<br>(-3.14)       | -0.716**<br>(-3.31)        | -0.713**<br>(-3.22) |
| Delta                      | -                    | 1.128                     | 1.662                      | 2.308               |
| Observations               | 333                  | 333                       | 333                        | 329                 |
| R-squared                  | 0.363                | 0.380                     | 0.387                      | 0.410               |
| Panel B: Dummy Models      |                      |                           |                            |                     |
| All Female                 | -0.716**<br>(-2.95)  | -0.619**<br>(-2.40)       | -0.639**<br>(-2.64)        | -0.645**<br>(-2.62) |
| Delta                      | -                    | 1.267                     | 1.495                      | 2.150               |
| Mixed-Gender               | -0.355<br>(-1.23)    | -0.311<br>(-1.21)         | -0.331<br>(-1.28)          | -0.322<br>(-1.21)   |
| Delta                      | -                    | 1.473                     | 2.823                      | 2.783               |
| Observations               | 333                  | 333                       | 333                        | 329                 |
| R-squared                  | 0.361                | 0.386                     | 0.392                      | 0.414               |

Table A2: Reporting of additional coefficients

**Table A2 - Panel A: Additional coefficients for Table 3**

|                    |                       | Funding Goal         |                      |                   |                   |
|--------------------|-----------------------|----------------------|----------------------|-------------------|-------------------|
|                    |                       | Continuous model     | Dummy model          | Continuous model  | Dummy model       |
| SEIS               | (D)                   | -0.671***<br>(-4.59) | -0.672***<br>(-4.64) | -0.581<br>(-1.60) | -0.541<br>(-1.48) |
| EIS                | (D)                   | 0.234<br>(1.55)      | 0.216<br>(1.45)      | 0.177<br>(0.50)   | 0.194<br>(0.55)   |
| SECTOR             | (D)                   |                      |                      |                   |                   |
|                    | CLOTHING & HOME       | -0.066<br>(-0.45)    | -0.057<br>(-0.39)    | -0.549<br>(-1.64) | -0.537<br>(-1.62) |
|                    | E-COMMERCE            | -0.000<br>(-0.00)    | 0.011<br>(0.09)      | -0.117<br>(-0.48) | -0.093<br>(-0.38) |
|                    | FINANCE               | 0.221<br>(1.38)      | 0.211<br>(1.31)      | 0.108<br>(0.35)   | 0.088<br>(0.28)   |
|                    | FOOD & DRINK          | 0.252**<br>(2.14)    | 0.263**<br>(2.21)    | 0.092<br>(0.28)   | 0.102<br>(0.31)   |
|                    | GAMES & ENTERTAINMENT | 0.031<br>(0.26)      | 0.057<br>(0.47)      | -0.380<br>(-1.32) | -0.339<br>(-1.19) |
|                    | TRANSPORT & TRAVEL    | 0.051<br>(0.46)      | 0.053<br>(0.48)      | -0.292<br>(-0.98) | -0.269<br>(-0.88) |
| DELIVERY MODE      | (D)                   |                      |                      |                   |                   |
|                    | DIGITAL               |                      |                      | -0.093<br>(-0.45) | -0.120<br>(-0.58) |
|                    | NON-DIGITAL           |                      |                      | -0.008<br>(-0.04) | 0.001<br>(0.01)   |
| PRODUCT TYPE       | (D)                   |                      |                      |                   |                   |
|                    | B2B                   |                      |                      | -0.369<br>(-1.41) | -0.308<br>(-1.24) |
|                    | B2C                   |                      |                      | -0.079<br>(-0.39) | -0.050<br>(-0.26) |
| GPT VARIABLES      |                       | No                   | No                   | Yes               | Yes               |
| QUARTER            | Fixed effects         | Yes                  | Yes                  | Yes               | Yes               |
| N                  |                       | 767                  | 767                  | 329               | 329               |
| Adjusted R-squared |                       | 0.344                | 0.346                | 0.334             | 0.338             |

**Table A2 - Panel B: Additional coefficients for Table 4**

|                       |               | Campaign success   |                    |                    |                    |
|-----------------------|---------------|--------------------|--------------------|--------------------|--------------------|
|                       |               | Total effect       |                    | Direct effect      |                    |
|                       |               | Continuous model   | Dummy model        | Continuous model   | Dummy model        |
| SEIS                  | (D)           | 0.448**<br>(2.19)  | 0.437**<br>(2.18)  | 0.298<br>(1.45)    | 0.290<br>(1.44)    |
| EIS                   | (D)           | 0.703***<br>(3.57) | 0.696***<br>(3.62) | 0.795***<br>(4.22) | 0.785***<br>(4.25) |
| SECTOR                | (D)           |                    |                    |                    |                    |
| CLOTHING & HOME       |               | 0.439**<br>(2.34)  | 0.424**<br>(2.28)  | 0.405**<br>(2.15)  | 0.391**<br>(2.09)  |
| E-COMMERCE            |               | -0.093<br>(-0.49)  | -0.085<br>(-0.44)  | -0.132<br>(-0.68)  | -0.120<br>(-0.62)  |
| FINANCE               |               | 0.688***<br>(3.54) | 0.694***<br>(3.58) | 0.732***<br>(3.69) | 0.735***<br>(3.71) |
| FOOD & DRINK          |               | 0.522**<br>(2.52)  | 0.527**<br>(2.61)  | 0.543**<br>(2.55)  | 0.551**<br>(2.64)  |
| GAMES & ENTERTAINMENT |               | 0.136<br>(0.62)    | 0.159<br>(0.73)    | 0.112<br>(0.51)    | 0.144<br>(0.66)    |
| TRANSPORT & TRAVEL    |               | 0.288<br>(1.48)    | 0.268<br>(1.37)    | 0.276<br>(1.40)    | 0.257<br>(1.29)    |
| GOAL & VALUATION      |               | No                 | No                 | Yes                | Yes                |
| QUARTER               | Fixed effects | Yes                | Yes                | Yes                | Yes                |
| N                     |               | 767                | 767                | 767                | 767                |
| Pseudo R-squared      |               | 0.200              | 0.198              | 0.213              | 0.212              |

**Table A2 - Panel C: Additional coefficients for Table 5**

|                       |               | Funding Received   |                   |                     |                     |
|-----------------------|---------------|--------------------|-------------------|---------------------|---------------------|
|                       |               | Total effect       |                   | Direct effect       |                     |
|                       |               | Continuous model   | Dummy model       | Continuous model    | Dummy model         |
| SEIS                  | (D)           | -0.506<br>(-1.33)  | -0.477<br>(-1.25) | 0.085<br>(1.25)     | 0.075<br>(1.13)     |
| EIS                   | (D)           | 0.270<br>(0.72)    | 0.297<br>(0.81)   | 0.084<br>(1.28)     | 0.093<br>(1.45)     |
| SECTOR                | (D)           |                    |                   |                     |                     |
| CLOTHING & HOME       |               | -0.435<br>(-1.19)  | -0.411<br>(-1.14) | 0.128<br>(1.60)     | 0.140*<br>(1.77)    |
| E-COMMERCE            |               | -0.155<br>(-0.60)  | -0.133<br>(-0.51) | -0.031<br>(-0.49)   | -0.033<br>(-0.53)   |
| FINANCE               |               | 0.149<br>(0.45)    | 0.144<br>(0.43)   | 0.044<br>(0.64)     | 0.058<br>(0.82)     |
| FOOD & DRINK          |               | 0.192<br>(0.55)    | 0.196<br>(0.56)   | 0.105<br>(1.30)     | 0.098<br>(1.17)     |
| GAMES & ENTERTAINMENT |               | -0.366<br>(-1.17)  | -0.320<br>(-1.02) | 0.026<br>(0.25)     | 0.031<br>(0.31)     |
| TRANSPORT & TRAVEL    |               | -0.309<br>(-0.96)  | -0.294<br>(-0.90) | -0.009<br>(-0.11)   | -0.017<br>(-0.22)   |
| DELIVERY MODE         |               |                    |                   |                     |                     |
| DIGITAL               | (D)           | -0.030<br>(-0.14)  | -0.057<br>(-0.27) | 0.065<br>(1.20)     | 0.065<br>(1.23)     |
| NON-DIGITAL           | (D)           | -0.034<br>(-0.16)  | -0.012<br>(-0.06) | -0.023<br>(-0.40)   | -0.011<br>(-0.18)   |
| PRODUCT TYPE          |               |                    |                   |                     |                     |
| B2B                   | (D)           | -0.507*<br>(-1.81) | -0.440<br>(-1.65) | -0.128**<br>(-2.17) | -0.123**<br>(-2.06) |
| B2C                   | (D)           | -0.134<br>(-0.62)  | -0.114<br>(-0.53) | -0.051<br>(-0.98)   | -0.061<br>(-1.15)   |
| GPT SCORES            |               | Yes                | Yes               | Yes                 | Yes                 |
| QUARTER               | Fixed effects | Yes                | Yes               | Yes                 | Yes                 |
| N                     |               | 329                | 329               | 329                 | 329                 |
| Adjusted R-squared    |               | 0.333              | 0.335             | 0.952               | 0.953               |

## Table A3: Valuations and Investor Stakes

**Table A3: Investor Equity Stake vs Post-Money Valuation**

|                          |     | Continuous Model         |                         | Dummy Model              |                         |
|--------------------------|-----|--------------------------|-------------------------|--------------------------|-------------------------|
|                          |     | Investor<br>Equity Stake | Post-Money<br>Valuation | Investor<br>Equity Stake | Post-Money<br>Valuation |
| FEMALES                  | (%) | -0.847<br>(-0.88)        | -1.076<br>(-1.18)       |                          |                         |
| ALL-FEMALE               | (D) |                          |                         | -0.202<br>(-0.20)        | -0.415<br>(-0.42)       |
| MIXED-GENDER             | (D) |                          |                         | -1.592<br>(-1.62)        | -1.656*<br>(-1.82)      |
| N                        |     |                          | 329                     |                          | 329                     |
| Correlation of Residuals |     |                          | 0.994                   |                          | 0.994                   |
| Breusch-Pagan Chi-2      |     |                          | 324.833                 |                          | 324.852                 |
| P-value                  |     |                          | 0.000                   |                          | 0.000                   |

Table A4: Investments by investors with unknown gender

|                    |     | Total Investment from Investors of Unknown Gender |                   |                    |                    |
|--------------------|-----|---------------------------------------------------|-------------------|--------------------|--------------------|
|                    |     | Total effect                                      |                   | Direct effect      |                    |
|                    |     | Continuous model                                  | Dummy model       | Continuous model   | Dummy model        |
| FEMALES            | (%) | -0.453<br>(-5.11)                                 |                   | 0.213<br>(-1.41)   |                    |
| ALL-FEMALE         | (D) |                                                   | -0.493<br>(-1.40) |                    | -0.002<br>(-0.01)  |
| MIXED-GENDER       | (D) |                                                   | 0.075<br>(0.18)   |                    | 0.508<br>(1.53)    |
| GOAL               |     |                                                   |                   | 1.034***<br>(9.04) | 1.032***<br>(8.98) |
| VALUATION          |     |                                                   |                   | 0.137<br>(1.39)    | 0.123<br>(1.25)    |
| ALL OTHER CONTROLS |     | Yes                                               | Yes               | Yes                | Yes                |
| N                  |     | 329                                               | 329               | 329                | 329                |
| Adjusted R-squared |     | 0.261                                             | 0.269             | 0.499              | 0.503              |

Table A5. Interactions with other founder characteristics

**Table A5 - Panel A: Interaction with Entrepreneurial Experience**

|                          |     | Funding goal        |                    | Funding received    |                    |
|--------------------------|-----|---------------------|--------------------|---------------------|--------------------|
|                          |     | Continuous model    | Dummy model        | Continuous model    | Dummy model        |
| FEMALES                  | (%) | -0.189**<br>(-2.83) |                    | -0.220**<br>(-3.27) |                    |
| ALL-FEMALE               | (D) |                     | -0.317<br>(-1.09)  |                     | -0.505*<br>(-1.76) |
| MIXED-GENDER             | (D) |                     | -0.502*<br>(-1.73) |                     | -0.355<br>(-1.13)  |
| ENT. EXP.                |     | 0.160**<br>(2.34)   | 0.328*<br>(1.92)   | 0.146*<br>(1.92)    | 0.303<br>(1.61)    |
| FEMALES X ENT. EXP.      |     | -0.048<br>(-1.03)   |                    | -0.063<br>(-1.28)   |                    |
| ALL-FEMALE X ENT. EXP.   |     |                     | -0.665*<br>(-1.74) |                     | -0.674*<br>(-1.77) |
| MIXED-GENDER X ENT. EXP. |     |                     | 0.447<br>(1.06)    |                     | 0.188<br>(0.43)    |
| ALL OTHER CONTROLS       |     | Yes                 | Yes                | Yes                 | Yes                |
| N                        |     | 329                 | 329                | 329                 | 329                |
| Adjusted R-Squared       |     | 0.333               | 0.339              | 0.333               | 0.333              |

**Table A5 - Panel B: Interaction with Senior Management Experience**

|                          |     | Funding goal        |                    | Funding received    |                   |
|--------------------------|-----|---------------------|--------------------|---------------------|-------------------|
|                          |     | Continuous model    | Dummy model        | Continuous model    | Dummy model       |
| FEMALES                  | (%) | -0.199**<br>(-2.67) |                    | -0.231**<br>(-3.08) |                   |
| ALL-FEMALE               | (D) |                     | -0.098<br>(-0.31)  |                     | -0.446<br>(-1.34) |
| MIXED-GENDER             | (D) |                     | -1.401*<br>(-1.71) |                     | -1.371<br>(-1.51) |
| MAN. EXP.                |     | 0.007<br>(0.08)     | 0.079<br>(0.36)    | 0.005<br>(0.05)     | 0.091<br>(0.37)   |
| FEMALES X MAN. EXP.      |     | 0.037<br>(0.41)     |                    | 0.046<br>(0.51)     |                   |
| ALL-FEMALE X MAN. EXP.   |     |                     | -0.496<br>(-1.20)  |                     | -0.313<br>(-0.74) |
| MIXED-GENDER X MAN. EXP. |     |                     | 1.276<br>(1.54)    |                     | 1.350<br>(1.47)   |
| ALL OTHER CONTROLS       |     | Yes                 | Yes                | Yes                 | Yes               |
| N                        |     | 329                 | 329                | 329                 | 329               |
| Adjusted R-Squared       |     | 0.333               | 0.354              | 0.332               | 0.349             |

**Table A5 - Panel C: Interaction with Education**

|                          |     | Funding goal        |                    | Funding received    |                     |
|--------------------------|-----|---------------------|--------------------|---------------------|---------------------|
|                          |     | Continuous model    | Dummy model        | Continuous model    | Dummy model         |
| FEMALES                  | (%) | -0.188**<br>(-2.81) |                    | -0.218**<br>(-3.25) |                     |
| ALL-FEMALE               | (D) |                     | -0.458*<br>(-1.74) |                     | -0.678**<br>(-2.64) |
| MIXED-GENDER             | (D) |                     | -0.480*<br>(-1.67) |                     | -0.375<br>(-1.21)   |
| EDUCATION                |     | 0.124<br>(1.62)     | 0.284<br>(1.12)    | 0.133<br>(1.58)     | 0.292<br>(1.06)     |
| FEMALES X EDUCATION      |     | 0.044<br>(0.85)     |                    | 0.068<br>(1.20)     |                     |
| ALL-FEMALE X EDUCATION   |     |                     | 0.073<br>(0.12)    |                     | 0.320<br>(0.48)     |
| MIXED-GENDER X EDUCATION |     |                     | 0.421<br>(0.94)    |                     | 0.329<br>(0.72)     |
| ALL OTHER CONTROLS       |     | Yes                 | Yes                | Yes                 | Yes                 |
| N                        |     | 329                 | 329                | 329                 | 329                 |
| Adjusted R-Squared       |     | 0.333               | 0.335              | 0.333               | 0.331               |

## Table A6. Post-SEEDRS performance

Table A6 uses the sample of companies that had successful SEEDRS campaigns. For companies with multiple campaigns, the variable FUNDING RECEIVED (SEEDRS) adds up the amounts raised on SEEDRS across all campaigns. The new dependent variables of interest are EXIT, a dummy variable for whether the company was acquired or went public; RECEIVED EXTERNAL FUNDING which is a dummy variable whether the company received any outside funding; and EXTERNAL FUNDING AMOUNT, using  $\log(1 + \text{amount raised})$  where the amount raised is set to 0 for companies with RECEIVED EXTERNAL FUNDING = 0).

**Table A6 Panel A: Descriptive Statistics**

| Variable                  | Average       |               |              |              |
|---------------------------|---------------|---------------|--------------|--------------|
|                           | ALL           | ALL-MALE      | ALL-FEMALE   | MIXED-GENDER |
|                           | <i>N</i> =185 | <i>N</i> =138 | <i>N</i> =18 | <i>N</i> =29 |
| RECEIVED EXTERNAL FUNDING | .843          | .855          | .556***      | .966         |
| EXTERNAL FUNDING AMOUNT   | 11.3          | 11.6          | 6.97***      | 12.6         |
| EXIT                      | .119          | .123          | .111         | .103         |

**Table A6 Panel B: Key correlations**

|                              |   |       | 1         | 2         | 3        | 4        | 5        | 6        | 7       | 8 |
|------------------------------|---|-------|-----------|-----------|----------|----------|----------|----------|---------|---|
| RECEIVED EXT FUNDING         | 1 |       | 1         |           |          |          |          |          |         |   |
| EXT FUNDING AMOUNT           | 2 |       | 0.943***  | 1         |          |          |          |          |         |   |
| EXIT                         | 3 |       | 0.158**   | 0.267***  | 1        |          |          |          |         |   |
| FUNDING GOAL                 | 4 | $G_i$ | -0.045    | 0.154**   | 0.234**  | 1        |          |          |         |   |
| INVESTMENT RECEIVED (SEEDRS) | 5 |       | -0.123*   | 0.129*    | 0.249*** | 0.817*** | 1        |          |         |   |
| FEMALES (%)                  | 6 | $X_i$ | -0.166**  | -0.196**  | -0.022   | -0.139*  | -0.202** | 1        |         |   |
| ALL-FEMALE (D)               | 7 | $X_i$ | -0.260*** | -0.274*** | -0.008   | -0.102   | -0.163** | 0.869*** | 1       |   |
| MIXED-GENDER (D)             | 8 | $X_i$ | 0.145**   | 0.11      | -0.021   | -0.052   | -0.08    | 0.350*** | -0.142* | 1 |

Table A6 Panel C: Exit

|                           |     | Exit             |                 |                  |                  |                    |                  |
|---------------------------|-----|------------------|-----------------|------------------|------------------|--------------------|------------------|
|                           |     | Total effect     |                 | Direct effect    |                  | Alt. Direct effect |                  |
|                           |     | Continuous model | Dummy model     | Continuous model | Dummy model      | Continuous model   | Dummy model      |
| FEMALES                   | (%) | 0.027<br>(0.38)  |                 | 0.040<br>(0.57)  |                  | 0.041<br>(0.58)    |                  |
| ALL-FEMALE                | (D) |                  | 0.039<br>(0.45) |                  | 0.051<br>(0.60)  |                    | 0.057<br>(0.67)  |
| MIXED-GENDER              | (D) |                  | 0.008<br>(0.11) |                  | 0.010<br>(0.14)  |                    | 0.011<br>(0.15)  |
| GOAL                      |     |                  |                 | 0.027<br>(0.50)  | 0.025<br>(0.46)  | 0.024<br>(0.39)    | 0.015<br>(0.24)  |
| VALUATION                 |     |                  |                 | 0.055*<br>(1.86) | 0.059*<br>(1.89) | 0.055*<br>(1.84)   | 0.058*<br>(1.85) |
| FUNDING RECEIVED (SEEDRS) |     |                  |                 |                  |                  | 0.003<br>(0.07)    | 0.011<br>(0.28)  |
| ALL CONTROLS              |     | Yes              | Yes             | Yes              | Yes              | Yes                | Yes              |
| N                         |     | 184              | 184             | 184              | 184              | 184                | 184              |
| Adjusted R-squared        |     | 0.101            | 0.093           | 0.143            | 0.139            | 0.137              | 0.134            |

**Table A6 Panel D: Received External Funding**

|                           |     | External Funding Received |             |                  |             |                    |             |
|---------------------------|-----|---------------------------|-------------|------------------|-------------|--------------------|-------------|
|                           |     | Total effect              |             | Direct effect    |             | Alt. Direct effect |             |
|                           |     | Continuous model          | Dummy model | Continuous model | Dummy model | Continuous model   | Dummy model |
| FEMALES                   | (%) | -0.182*                   |             | -0.184*          |             | -0.231**           |             |
|                           |     | (-1.73)                   |             | (-1.72)          |             | (-2.16)            |             |
| ALL-FEMALE                | (D) |                           | -0.326**    |                  | -0.326**    |                    | -0.393**    |
|                           |     |                           | (-2.59)     |                  | (-2.57)     |                    | (-3.01)     |
| MIXED-GENDER              | (D) |                           | 0.162**     |                  | 0.160**     |                    | 0.151**     |
|                           |     |                           | (2.27)      |                  | (2.19)      |                    | (2.14)      |
| GOAL                      |     |                           |             | -0.012           | -0.009      | 0.083              | 0.097*      |
|                           |     |                           |             | (-0.43)          | (-0.28)     | (1.46)             | (1.70)      |
| VALUATION                 |     |                           |             | 0.015            | 0.016       | 0.020              | 0.023       |
|                           |     |                           |             | (0.60)           | (0.63)      | (0.78)             | (0.84)      |
| FUNDING RECEIVED (SEEDRS) |     |                           |             |                  |             | -0.105**           | -0.116**    |
|                           |     |                           |             |                  |             | (-2.04)            | (-2.35)     |
| ALL CONTROLS              |     | Yes                       | Yes         | Yes              | Yes         | Yes                | Yes         |
| N                         |     | 184                       | 184         | 184              | 184         | 184                | 184         |
| Pseudo R-squared          |     | 0.023                     | 0.082       | 0.011            | 0.071       | 0.043              | 0.112       |

**Table A6 Panel E: External Funding Amount**

|                           |     | External Funding Amount |                     |                    |                     |                     |                     |
|---------------------------|-----|-------------------------|---------------------|--------------------|---------------------|---------------------|---------------------|
|                           |     | Total effect            |                     | Direct effect      |                     | Alt. Direct effect  |                     |
|                           |     | Continuous model        | Dummy model         | Continuous model   | Dummy model         | Continuous model    | Dummy model         |
| FEMALES                   | (%) | -3.074**<br>(-2.05)     |                     | -2.889*<br>(-1.89) |                     | -3.037**<br>(-2.01) |                     |
| ALL-FEMALE                | (D) |                         | -5.025**<br>(-2.82) |                    | -4.851**<br>(-2.68) |                     | -5.128**<br>(-2.81) |
| MIXED-GENDER              | (D) |                         | 1.776*<br>(1.84)    |                    | 1.850*<br>(1.90)    |                     | 1.813*<br>(1.88)    |
| GOAL                      |     |                         |                     | 0.500<br>(1.09)    | 0.533<br>(1.13)     | 0.800<br>(0.89)     | 0.973<br>(1.09)     |
| VALUATION                 |     |                         |                     | 0.526<br>(1.15)    | 0.563<br>(1.18)     | 0.542<br>(1.17)     | 0.589<br>(1.22)     |
| FUNDING RECEIVED (SEEDRS) |     |                         |                     |                    |                     | -0.332<br>(-0.42)   | -0.483<br>(-0.63)   |
| ALL CONTROLS              |     | Yes                     | Yes                 | Yes                | Yes                 | Yes                 | Yes                 |
| N                         |     | 184                     | 184                 | 184                | 184                 | 184                 | 184                 |
| Adjusted R-squared        |     | 0.041                   | 0.086               | 0.057              | 0.106               | 0.052               | 0.104               |

Table A7. Number of investors

Panel A - Table A7. The number of investors

|                    |     | No. Investors (All) |                     |                     |                     |
|--------------------|-----|---------------------|---------------------|---------------------|---------------------|
|                    |     | Total effect        |                     | Direct effect       |                     |
|                    |     | Continuous model    | Dummy model         | Continuous model    | Dummy model         |
| FEMALES            | (%) | -0.534**<br>(-3.29) |                     | -0.259**<br>(-2.08) |                     |
| ALL-FEMALE         | (D) |                     | -0.564**<br>(-3.27) |                     | -0.355**<br>(-2.73) |
| MIXED-GENDER       | (D) |                     | -0.186<br>(-1.02)   |                     | -0.007<br>(-0.05)   |
| GPT GROWTH         |     | 0.018**<br>(2.39)   | 0.017**<br>(2.29)   | 0.008<br>(1.22)     | 0.008<br>(1.25)     |
| GPT CAPITAL        |     | 0.011**<br>(2.05)   | 0.012**<br>(2.07)   | 0.006<br>(1.31)     | 0.006<br>(1.36)     |
| ALL OTHER CONTROLS |     | Yes                 | Yes                 | Yes                 | Yes                 |
| N                  |     | 329                 | 329                 | 329                 | 329                 |
| Adjusted R-Squared |     | 0.263               | 0.262               | 0.496               | 0.499               |

**Panel B - Table A7. The number of female investors**

|                    |     | No. Female Investors |                   |                  |                   |
|--------------------|-----|----------------------|-------------------|------------------|-------------------|
|                    |     | Total effect         |                   | Direct effect    |                   |
|                    |     | Continuous model     | Dummy model       | Continuous model | Dummy model       |
| FEMALES            | (%) | -0.209<br>(-1.09)    |                   | 0.082<br>(0.55)  |                   |
| ALL-FEMALE         | (D) |                      | -0.253<br>(-1.17) |                  | -0.032<br>(-0.19) |
| MIXED-GENDER       | (D) |                      | -0.017<br>(-0.09) |                  | 0.176<br>(1.28)   |
| GPT GROWTH         |     | 0.021**<br>(2.74)    | 0.021**<br>(2.66) | 0.011<br>(1.64)  | 0.011*<br>(1.70)  |
| GPT CAPITAL        |     | 0.012*<br>(1.84)     | 0.012*<br>(1.87)  | 0.006<br>(1.14)  | 0.006<br>(1.19)   |
| ALL OTHER CONTROLS |     | Yes                  | Yes               | Yes              | Yes               |
| N                  |     | 329                  | 329               | 329              | 329               |
| Adjusted R-Squared |     | 0.226                | 0.224             | 0.472            | 0.478             |

**Panel C - Table A7. The number of male investors**

|                    |     | No. Male Investors   |                      |                     |                     |
|--------------------|-----|----------------------|----------------------|---------------------|---------------------|
|                    |     | Total effect         |                      | Direct effect       |                     |
|                    |     | Continuous model     | Dummy model          | Continuous model    | Dummy model         |
| FEMALES            | (%) | -0.580***<br>(-3.79) |                      | -0.323**<br>(-2.65) |                     |
| ALL-FEMALE         | (D) |                      | -0.609***<br>(-3.77) |                     | -0.414**<br>(-3.26) |
| MIXED-GENDER       | (D) |                      | -0.198<br>(-1.14)    |                     | -0.031<br>(-0.23)   |
| GPT GROWTH         |     | 0.014**<br>(2.02)    | 0.014*<br>(1.93)     | 0.005<br>(0.76)     | 0.005<br>(0.80)     |
| GPT CAPITAL        |     | 0.009*<br>(1.83)     | 0.010*<br>(1.85)     | 0.004<br>(1.01)     | 0.004<br>(1.05)     |
| ALL OTHER CONTROLS |     | Yes                  | Yes                  | Yes                 | Yes                 |
| N                  |     | 329                  | 329                  | 329                 | 329                 |
| Adjusted R-Squared |     | 0.254                | 0.252                | 0.488               | 0.492               |

Table A8. Average investment amounts

**Panel A - Table A8. Average Investment Amount**

|                    |     | Average Investment Amount |                   |                    |                    |
|--------------------|-----|---------------------------|-------------------|--------------------|--------------------|
|                    |     | Total effect              |                   | Direct effect      |                    |
|                    |     | Continuous model          | Dummy model       | Continuous model   | Dummy model        |
| FEMALES            | (%) | -0.178<br>(-1.10)         |                   | 0.169<br>(1.43)    |                    |
| ALL-FEMALE         | (D) |                           | -0.082<br>(-0.45) |                    | 0.169<br>(1.34)    |
| MIXED-GENDER       | (D) |                           | -0.135<br>(-0.69) |                    | 0.104<br>(0.77)    |
| GPT GROWTH         |     | 0.009<br>(1.06)           | 0.008<br>(0.95)   | -0.003<br>(-0.49)  | -0.003<br>(-0.53)  |
| GPT CAPITAL        |     | -0.001<br>(-0.26)         | -0.002<br>(-0.30) | -0.007*<br>(-1.80) | -0.007*<br>(-1.83) |
| ALL OTHER CONTROLS |     | Yes                       | Yes               | Yes                | Yes                |
| N                  |     | 329                       | 329               | 329                | 329                |
| Adjusted R-Squared |     | 0.187                     | 0.193             | 0.567              | 0.567              |

**Panel B - Table A8. Average Investment Amount from Female Investors**

|                    |     | Average Investment Amount from Female Investors |                   |                   |                   |
|--------------------|-----|-------------------------------------------------|-------------------|-------------------|-------------------|
|                    |     | Total effect                                    |                   | Direct effect     |                   |
|                    |     | Continuous model                                | Dummy model       | Continuous model  | Dummy model       |
| FEMALES            | (%) | 0.286<br>(0.75)                                 |                   | 0.632**<br>(2.08) |                   |
| ALL-FEMALE         | (D) |                                                 | 0.215<br>(0.45)   |                   | 0.432<br>(1.11)   |
| MIXED-GENDER       | (D) |                                                 | 0.238<br>(0.62)   |                   | 0.544*<br>(1.90)  |
| GPT GROWTH         |     | -0.001<br>(-0.08)                               | -0.002<br>(-0.13) | -0.012<br>(-0.82) | -0.013<br>(-0.80) |
| GPT CAPITAL        |     | -0.005<br>(-0.51)                               | -0.004<br>(-0.47) | -0.010<br>(-1.20) | -0.010<br>(-1.16) |
| ALL OTHER CONTROLS |     | Yes                                             | Yes               | Yes               | Yes               |
| N                  |     | 320                                             | 320               | 320               | 320               |
| Adjusted R-Squared |     | 0.042                                           | 0.040             | 0.232             | 0.238             |

**Panel C - Table A8. Average Investment Amount from Male Investors**

|                    |     | Average Investment Amount from Male Investors |                    |                   |                   |
|--------------------|-----|-----------------------------------------------|--------------------|-------------------|-------------------|
|                    |     | Total effect                                  |                    | Direct effect     |                   |
|                    |     | Continuous model                              | Dummy model        | Continuous model  | Dummy model       |
| FEMALES            | (%) | -0.398**<br>(-2.55)                           |                    | -0.076<br>(-0.64) |                   |
| ALL-FEMALE         | (D) |                                               | -0.301*<br>(-1.86) |                   | -0.065<br>(-0.51) |
| MIXED-GENDER       | (D) |                                               | -0.283<br>(-1.50)  |                   | -0.063<br>(-0.44) |
| GPT GROWTH         |     | 0.017**<br>(2.26)                             | 0.017**<br>(2.15)  | 0.006<br>(0.86)   | 0.006<br>(0.89)   |
| GPT CAPITAL        |     | 0.002<br>(0.40)                               | 0.002<br>(0.33)    | -0.004<br>(-0.86) | -0.004<br>(-0.90) |
| ALL OTHER CONTROLS |     | Yes                                           | Yes                | Yes               | Yes               |
| N                  |     | 329                                           | 329                | 329               | 329               |
| Adjusted R-Squared |     | 0.139                                         | 0.133              | 0.468             | 0.463             |

Table A9. Determinants of repeat campaigns

|                     |     | Second Campaign     |                   |                            |                     |
|---------------------|-----|---------------------|-------------------|----------------------------|---------------------|
|                     |     | All First Campaigns |                   | Successful First Campaigns |                     |
|                     |     | Continuous model    | Dummy model       | Continuous model           | Dummy model         |
| FEMALES             | (%) | 0.002<br>(0.01)     |                   | -0.689*<br>(-1.77)         |                     |
| ALL-FEMALE          | (D) |                     | -0.185<br>(-0.78) |                            | -1.161**<br>(-2.57) |
| MIXED-GENDER        | (D) |                     | 0.277<br>(1.43)   |                            | 0.118<br>(0.30)     |
| PRIOR FUNDING RAISE |     |                     |                   | -0.453<br>(-1.15)          | -0.546<br>(-1.34)   |
| GPT VARIABLES       |     | No                  | No                | Yes                        | Yes                 |
| ALL OTHER CONTROLS  |     | Yes                 | Yes               | Yes                        | Yes                 |
| N                   |     | 570                 | 570               | 142                        | 142                 |

Table A10. Dropping repeat campaigns

**Panel A - Table A10. Funding goals with repeat campaigns dropped**

|                    |     | Funding Goal        |                    |                   |                   |
|--------------------|-----|---------------------|--------------------|-------------------|-------------------|
|                    |     | Continuous model    | Dummy model        | Continuous model  | Dummy model       |
| FEMALES            | (%) | -0.228**<br>(-2.18) |                    | -0.282<br>(-1.27) |                   |
| ALL-FEMALE         | (D) |                     | -0.203*<br>(-1.71) |                   | -0.206<br>(-0.77) |
| MIXED-GENDER       | (D) |                     | -0.148<br>(-1.36)  |                   | -0.173<br>(-0.66) |
| GPT VARIABLES      |     | No                  | No                 | Yes               | Yes               |
| ALL OTHER CONTROLS |     | Yes                 | Yes                | Yes               | Yes               |
| N                  |     | 570                 | 570                | 184               | 184               |
| Adjusted R-squared |     | 0.400               | 0.399              | 0.412             | 0.414             |

**Panel B- Table A10. Campaign success with repeat campaigns dropped**

|                    |     | Campaign success  |                   |                   |                   |
|--------------------|-----|-------------------|-------------------|-------------------|-------------------|
|                    |     | Total effect      |                   | Direct effect     |                   |
|                    |     | Continuous model  | Dummy model       | Continuous model  | Dummy model       |
| FEMALES            | (%) | -0.088<br>(-0.47) |                   | -0.129<br>(-0.68) |                   |
| ALL-FEMALE         | (D) |                   | -0.174<br>(-0.83) |                   | -0.212<br>(-1.01) |
| MIXED-GENDER       | (D) |                   | 0.086<br>(0.49)   |                   | 0.060<br>(0.34)   |
| GOAL               |     |                   |                   | -0.130<br>(-1.52) | -0.127<br>(-1.48) |
| VALUATION          |     |                   |                   | -0.052<br>(-0.65) | -0.061<br>(-0.76) |
| ALL OTHER CONTROLS |     | Yes               | Yes               | Yes               | Yes               |
| N                  |     | 570               | 570               | 570               | 570               |

**Panel C- Table A10. Funding received with repeat campaigns dropped**

|                    |     | Funding Received |             |                  |             |
|--------------------|-----|------------------|-------------|------------------|-------------|
|                    |     | Total effect     |             | Direct effect    |             |
|                    |     | Continuous model | Dummy model | Continuous model | Dummy model |
| FEMALES            | (%) | -0.376*          |             | -0.095           |             |
|                    |     | (-1.75)          |             | (-1.05)          |             |
| ALL-FEMALE         | (D) |                  | -0.402      |                  | -0.195**    |
|                    |     |                  | (-1.56)     |                  | (-2.07)     |
| MIXED-GENDER       | (D) |                  | -0.124      |                  | 0.048       |
|                    |     |                  | (-0.45)     |                  | (0.60)      |
| GOAL               |     |                  |             | 0.990***         | 0.991***    |
|                    |     |                  |             | (31.97)          | (30.24)     |
| VALUATION          |     |                  |             | 0.018            | 0.022       |
|                    |     |                  |             | (0.78)           | (0.93)      |
| ALL OTHER CONTROLS |     | Yes              | Yes         | Yes              | Yes         |
| N                  |     | 184              | 184         | 184              | 184         |
| Adjusted R-squared |     | 0.419            | 0.417       | 0.935            | 0.935       |

## Table A11. Alternative Measure of Entrepreneurial Experience

**Panel A- Table A11. Funding goal with alternative entrepreneurial experience**

|                    |     | Funding Goal        |                     |                     |                     |
|--------------------|-----|---------------------|---------------------|---------------------|---------------------|
|                    |     | Continuous model    | Dummy model         | Continuous model    | Dummy model         |
| FEMALES            | (%) | -0.369**<br>(-2.76) |                     | -0.695**<br>(-3.19) |                     |
| ALL-FEMALE         | (D) |                     | -0.280*<br>(-1.85)  |                     | -0.509**<br>(-2.12) |
| MIXED-GENDER       | (D) |                     | -0.302**<br>(-2.22) |                     | -0.470*<br>(-1.78)  |
| ENT. EXP.-2        |     | 0.149<br>(1.45)     | 0.099<br>(1.16)     | 0.389**<br>(2.09)   | 0.221<br>(1.44)     |
| GPT VARIABLES      |     | No                  | No                  | Yes                 | Yes                 |
| ALL OTHER CONTROLS |     | Yes                 | Yes                 | Yes                 | Yes                 |
| N                  |     | 767                 | 767                 | 329                 | 329                 |
| Adjusted R-squared |     | 0.342               | 0.344               | 0.332               | 0.332               |

**Panel B- Table A11. Campaign success with alternative entrepreneurial experience**

|                    |     | Campaign success  |                   |                     |                     |
|--------------------|-----|-------------------|-------------------|---------------------|---------------------|
|                    |     | Total effect      |                   | Direct effect       |                     |
|                    |     | Continuous model  | Dummy model       | Continuous model    | Dummy model         |
| FEMALES            | (%) | -0.160<br>(-0.94) |                   | -0.232<br>(-1.37)   |                     |
| ALL-FEMALE         | (D) |                   | -0.142<br>(-0.74) |                     | -0.190<br>(-1.00)   |
| MIXED-GENDER       | (D) |                   | -0.072<br>(-0.47) |                     | -0.140<br>(-0.90)   |
| ENT. EXP.-2        |     | -0.159<br>(-1.13) | -0.076<br>(-0.65) | -0.132<br>(-0.95)   | -0.055<br>(-0.47)   |
| GOAL               |     |                   |                   | -0.167**<br>(-2.68) | -0.170**<br>(-2.69) |
| VALUATION          |     |                   |                   | -0.068<br>(-1.03)   | -0.067<br>(-1.00)   |
| ALL OTHER CONTROLS |     | Yes               | Yes               | Yes                 | Yes                 |
| N                  |     | 767               | 767               | 767                 | 767                 |

**Panel C- Table A11. Funding received with alternative entrepreneurial experience**

|                    |     | Funding Received     |                     |                     |                     |
|--------------------|-----|----------------------|---------------------|---------------------|---------------------|
|                    |     | Total effect         |                     | Direct effect       |                     |
|                    |     | Continuous model     | Dummy model         | Continuous model    | Dummy model         |
| FEMALES            | (%) | -0.785***<br>(-3.53) |                     | -0.077<br>(-1.32)   |                     |
| ALL-FEMALE         | (D) |                      | -0.696**<br>(-2.89) |                     | -0.176**<br>(-2.96) |
| MIXED-GENDER       | (D) |                      | -0.357<br>(-1.26)   |                     | 0.121**<br>(2.11)   |
| ENT. EXP.-2        |     | 0.294<br>(1.45)      | 0.104<br>(0.63)     | -0.102**<br>(-1.99) | -0.120**<br>(-2.94) |
| GOAL               |     |                      |                     | 1.014***<br>(62.68) | 1.016***<br>(58.43) |
| VALUATION          |     |                      |                     | 0.010<br>(0.56)     | 0.007<br>(0.41)     |
| ALL OTHER CONTROLS |     | Yes                  | Yes                 | Yes                 | Yes                 |
| N                  |     | 329                  | 329                 | 329                 | 329                 |
| Adjusted R-squared |     | 0.329                | 0.329               | 0.952               | 0.954               |

## Table A12. Alternative Measure of Education

**Panel A - Table A12. Funding goal with alternative education measure**

|                    |     | Funding Goal        |                     |                     |                    |
|--------------------|-----|---------------------|---------------------|---------------------|--------------------|
|                    |     | Continuous model    | Dummy model         | Continuous model    | Dummy model        |
| FEMALES            | (%) | -0.325**<br>(-2.31) |                     | -0.616**<br>(-2.70) |                    |
| ALL-FEMALE         | (D) |                     | -0.223<br>(-1.40)   |                     | -0.448*<br>(-1.76) |
| MIXED-GENDER       | (D) |                     | -0.278**<br>(-2.15) |                     | -0.387<br>(-1.56)  |
| EDUCATION-2        |     | 0.003<br>(0.03)     | -0.052<br>(-0.61)   | -0.041<br>(-0.21)   | -0.106<br>(-0.70)  |
| GPTVARIABLES       |     | No                  | No                  | Yes                 | Yes                |
| ALLOTHER CONTROLS  |     | Yes                 | Yes                 | Yes                 | Yes                |
| N                  |     | 756                 | 753                 | 323                 | 321                |
| Adjusted R-squared |     | 0.333               | 0.338               | 0.320               | 0.329              |

**Panel B - Table A12. Campaign success with alternative education measure**

|                   |     | Campaign success  |                   |                     |                     |
|-------------------|-----|-------------------|-------------------|---------------------|---------------------|
|                   |     | Total effect      |                   | Direct effect       |                     |
|                   |     | Continuous model  | Dummy model       | Continuous model    | Dummy model         |
| FEMALES           | (%) | -0.129<br>(-0.75) |                   | -0.190<br>(-1.11)   |                     |
| ALL-FEMALE        | (D) |                   | -0.119<br>(-0.61) |                     | -0.149<br>(-0.77)   |
| MIXED-GENDER      | (D) |                   | -0.080<br>(-0.52) |                     | -0.146<br>(-0.93)   |
| EDUCATION-2       |     | 0.078<br>(0.61)   | 0.119<br>(1.08)   | 0.079<br>(0.61)     | 0.111<br>(0.99)     |
| GOAL              |     |                   |                   | -0.191**<br>(-2.82) | -0.187**<br>(-2.72) |
| VALUATION         |     |                   |                   | -0.019<br>(-0.24)   | -0.021<br>(-0.26)   |
| ALLOTHER CONTROLS |     | Yes               | Yes               | Yes                 | Yes                 |
| N                 |     | 756               | 753               | 756                 | 753                 |

**Panel C - Table A12. Funding received with alternative education measure**

|                    |     | Funding Received    |                     |                     |                     |
|--------------------|-----|---------------------|---------------------|---------------------|---------------------|
|                    |     | Total effect        |                     | Direct effect       |                     |
|                    |     | Continuous model    | Dummy model         | Continuous model    | Dummy model         |
| FEMALES            | (%) | -0.715**<br>(-3.07) |                     | -0.088<br>(-1.41)   |                     |
| ALL-FEMALE         | (D) |                     | -0.651**<br>(-2.53) |                     | -0.194**<br>(-3.06) |
| MIXED-GENDER       | (D) |                     | -0.289<br>(-1.11)   |                     | 0.104*<br>(1.83)    |
| EDUCATION-2        |     | -0.070<br>(-0.33)   | -0.180<br>(-1.13)   | -0.033<br>(-0.67)   | -0.075*<br>(-1.85)  |
| GOAL               |     |                     |                     | 1.008***<br>(58.86) | 1.010***<br>(54.97) |
| VALUATION          |     |                     |                     | 0.020<br>(0.75)     | 0.020<br>(0.73)     |
| ALL OTHER CONTROLS |     | Yes                 | Yes                 | Yes                 | Yes                 |
| N                  |     | 323                 | 321                 | 323                 | 321                 |
| Adjusted R-squared |     | 0.322               | 0.329               | 0.952               | 0.954               |

## Table A13. Alternative GPT data

### Panel A - Table A13. Pairwise correlations with alternative GPT data

This table shows the pairwise correlation between the GTP variables that were generated with a prompt to explain, labelled as GPT (EXP.), and the main GPT variables.

|                    | No. |       | 1        | 2        | 3        | 4 |
|--------------------|-----|-------|----------|----------|----------|---|
| GROWTH GPT (EXP.)  | 1   | $Z_i$ | 1        |          |          |   |
| CAPITAL GPT (EXP.) | 2   | $Z_i$ | 0.229*** | 1        |          |   |
| GROWTH GPT         | 3   | $Z_i$ | 0.953*** | 0.225*** | 1        |   |
| CAPITAL GPT        | 4   | $Z_i$ | 0.239*** | 0.948*** | 0.238*** | 1 |

**Panel B - Table A13 Funding Goal with alternative GPT data**

|                    |               | Funding Goal         |                      |                      |                      |
|--------------------|---------------|----------------------|----------------------|----------------------|----------------------|
|                    |               | Continuous<br>model  | Dummy<br>model       | Continuous<br>model  | Dummy<br>model       |
| FEMALES            | (%)           | -0.347**<br>(-2.53)  |                      | -0.607**<br>(-2.81)  |                      |
| ALL-FEMALE         | (D)           |                      | -0.266*<br>(-1.72)   |                      | -0.442*<br>(-1.81)   |
| MIXED-GENDER       | (D)           |                      | -0.283**<br>(-2.12)  |                      | -0.415*<br>(-1.67)   |
| ENT. EXP.          | (%, D)        | 0.245*<br>(1.86)     | 0.156<br>(1.60)      | 0.480**<br>(2.35)    | 0.337**<br>(2.15)    |
| MAN. EXP.          | (%, D)        | 0.113<br>(1.09)      | 0.159<br>(1.60)      | 0.029<br>(0.14)      | 0.262<br>(1.16)      |
| EDUCATION          | (%, D)        | 0.396**<br>(2.35)    | 0.286**<br>(2.43)    | 0.509<br>(1.64)      | 0.374*<br>(1.85)     |
| TEAM SIZE          |               | 0.124**<br>(2.92)    | 0.120**<br>(2.51)    | 0.169**<br>(2.23)    | 0.172**<br>(1.97)    |
| PRIOR SEEDRS       |               | -0.921***<br>(-9.26) | -0.910***<br>(-9.25) | -0.923***<br>(-6.86) | -0.921***<br>(-6.77) |
| GPT GROWTH (EXP.)  |               |                      |                      | 0.019*<br>(1.90)     | 0.017*<br>(1.73)     |
| GPT CAPITAL (EXP.) |               |                      |                      | 0.011<br>(1.54)      | 0.011<br>(1.52)      |
| DELIVERY MODE      | Fixed effects | No                   | No                   | Yes                  | Yes                  |
| PRODUCT TYPE       | Fixed effects | No                   | No                   | Yes                  | Yes                  |
| SEIS/EIS           | Fixed effects | Yes                  | Yes                  | Yes                  | Yes                  |
| SECTOR             | Fixed effects | Yes                  | Yes                  | Yes                  | Yes                  |
| QUARTER            | Fixed effects | Yes                  | Yes                  | Yes                  | Yes                  |
| N                  |               | 767                  | 767                  | 329                  | 329                  |
| Adjusted R-squared |               | 0.344                | 0.346                | 0.329                | 0.333                |

**Panel C - Table A13. Funding Received with alternative GPT data**

|                    |               | Funding Received     |                      |                     |                     |
|--------------------|---------------|----------------------|----------------------|---------------------|---------------------|
|                    |               | Total effect         |                      | Direct effect       |                     |
|                    |               | Continuous model     | Dummy model          | Continuous model    | Dummy model         |
| FEMALES            | (%)           | -0.704**<br>(-3.20)  |                      | -0.087<br>(-1.44)   |                     |
| ALL-FEMALE         | (D)           |                      | -0.634**<br>(-2.60)  |                     | -0.183**<br>(-2.98) |
| MIXED-GENDER       | (D)           |                      | -0.324<br>(-1.22)    |                     | 0.099*<br>(1.77)    |
| ENT. EXP.          | (%, D)        | 0.440*<br>(1.95)     | 0.279<br>(1.63)      | -0.050<br>(-0.88)   | -0.065<br>(-1.45)   |
| MAN. EXP.          | (%, D)        | 0.026<br>(0.11)      | 0.310<br>(1.23)      | -0.002<br>(-0.03)   | 0.043<br>(0.79)     |
| EDUCATION          | (%, D)        | 0.565*<br>(1.67)     | 0.387*<br>(1.78)     | 0.041<br>(0.52)     | 0.002<br>(0.04)     |
| TEAM SIZE          |               | 0.145*<br>(1.87)     | 0.117<br>(1.28)      | -0.027<br>(-1.35)   | -0.059**<br>(-2.68) |
| PRIOR SEEDRS       |               | -0.889***<br>(-6.23) | -0.892***<br>(-6.22) | 0.045<br>(1.11)     | 0.043<br>(1.09)     |
| GPT GROWTH (EXP.)  |               | 0.024**<br>(2.31)    | 0.022**<br>(2.11)    | 0.005*<br>(1.83)    | 0.005*<br>(1.80)    |
| GPT CAPITAL (EXP.) |               | 0.008<br>(1.20)      | 0.008<br>(1.20)      | -0.003<br>(-1.29)   | -0.002<br>(-1.28)   |
| GOAL               |               |                      |                      | 1.012***<br>(62.09) | 1.015***<br>(58.07) |
| VALUATION          |               |                      |                      | 0.012<br>(0.71)     | 0.011<br>(0.65)     |
| DELIVERY MODE      | Fixed effects | Yes                  | Yes                  | Yes                 | Yes                 |
| PRODUCT TYPE       | Fixed effects | Yes                  | Yes                  | Yes                 | Yes                 |
| SEIS/EIS           | Fixed effects | Yes                  | Yes                  | Yes                 | Yes                 |
| SECTOR             | Fixed effects | Yes                  | Yes                  | Yes                 | Yes                 |
| QUARTER            | Fixed effects | Yes                  | Yes                  | Yes                 | Yes                 |
| N                  |               | 329                  | 329                  | 329                 | 329                 |
| Adjusted R-squared |               | 0.326                | 0.328                | 0.952               | 0.953               |

## Table A14. Bag of Words Analysis

**Panel A - Table A14. Pairwise correlations for Bag of Words variables**

|             | Growth GPT | Growth BOW | Capital GPT | Capital BOW |
|-------------|------------|------------|-------------|-------------|
| Growth GPT  | 1          |            |             |             |
| Growth BOW  | 0.154**    | 1          |             |             |
| Capital GPT | 0.238***   | 0.103*     | 1           |             |
| Capital BOW | 0.025      | 0.022      | 0.011       | 1           |

**Panel B - Table A14. Funding Goal with Bag of Words**

|                    |               | Funding Goal         |                      |                      |                      |
|--------------------|---------------|----------------------|----------------------|----------------------|----------------------|
|                    |               | Continuous model     | Dummy model          | Continuous model     | Dummy model          |
| FEMALES            | (%)           | -0.347**<br>(-2.53)  |                      | -0.639**<br>(-3.16)  |                      |
| ALL-FEMALE         | (D)           |                      | -0.266*<br>(-1.72)   |                      | -0.471**<br>(-2.07)  |
| MIXED-GENDER       | (D)           |                      | -0.283**<br>(-2.12)  |                      | -0.473**<br>(-2.01)  |
| ENT. EXP.          | (%, D)        | 0.245*<br>(1.86)     | 0.156<br>(1.60)      | 0.534**<br>(2.64)    | 0.362**<br>(2.32)    |
| MAN. EXP.          | (%, D)        | 0.113<br>(1.09)      | 0.159<br>(1.60)      | 0.040<br>(0.20)      | 0.229<br>(1.13)      |
| EDUCATION          | (%, D)        | 0.396**<br>(2.35)    | 0.286**<br>(2.43)    | 0.475<br>(1.57)      | 0.373*<br>(1.88)     |
| TEAM SIZE          |               | 0.124**<br>(2.92)    | 0.120**<br>(2.51)    | 0.141**<br>(2.01)    | 0.149*<br>(1.80)     |
| PRIOR SEEDRS       |               | -0.921***<br>(-9.26) | -0.910***<br>(-9.25) | -0.998***<br>(-8.04) | -0.992***<br>(-7.95) |
| GROWTH BOW         |               |                      |                      | 0.154***<br>(4.20)   | 0.146***<br>(4.08)   |
| CAPITAL BOW        |               |                      |                      | 0.023<br>(1.04)      | 0.026<br>(1.18)      |
| DELIVERY MODE      | Fixed effects | No                   | No                   | Yes                  | Yes                  |
| PRODUCT TYPE       | Fixed effects | No                   | No                   | Yes                  | Yes                  |
| SEIS/EIS           | Fixed effects | Yes                  | Yes                  | Yes                  | Yes                  |
| SECTOR             | Fixed effects | Yes                  | Yes                  | Yes                  | Yes                  |
| QUARTER            | Fixed effects | Yes                  | Yes                  | Yes                  | Yes                  |
| N                  |               | 767                  | 767                  | 328                  | 328                  |
| Adjusted R-squared |               | 0.344                | 0.346                | 0.358                | 0.361                |

**Panel C - Table A14. Funding Received with Bag of Words**

|                    |               | Funding Received     |                      |                     |                     |
|--------------------|---------------|----------------------|----------------------|---------------------|---------------------|
|                    |               | Total effect         |                      | Direct effect       |                     |
|                    |               | Continuous model     | Dummy model          | Continuous model    | Dummy model         |
| FEMALES            | (%)           | -0.748***<br>(-3.58) |                      | -0.100<br>(-1.57)   |                     |
| ALL-FEMALE         | (D)           |                      | -0.674**<br>(-2.92)  |                     | -0.195**<br>(-2.99) |
| MIXED-GENDER       | (D)           |                      | -0.390<br>(-1.56)    |                     | 0.090*<br>(1.68)    |
| ENT. EXP.          | (%, D)        | 0.495**<br>(2.19)    | 0.297*<br>(1.73)     | -0.048<br>(-0.84)   | -0.072<br>(-1.58)   |
| MAN. EXP.          | (%, D)        | 0.045<br>(0.21)      | 0.281<br>(1.24)      | 0.005<br>(0.10)     | 0.049<br>(0.88)     |
| EDUCATION          | (%, D)        | 0.530<br>(1.60)      | 0.384*<br>(1.77)     | 0.043<br>(0.53)     | 0.001<br>(0.01)     |
| TEAM SIZE          |               | 0.120*<br>(1.68)     | 0.097<br>(1.12)      | -0.024<br>(-1.21)   | -0.055**<br>(-2.61) |
| PRIOR SEEDRS       |               | -0.968***<br>(-7.18) | -0.965***<br>(-7.17) | 0.040<br>(0.97)     | 0.040<br>(1.00)     |
| GROWTH BOW         |               | 0.169***<br>(4.20)   | 0.162***<br>(4.10)   | 0.012<br>(1.19)     | 0.012<br>(1.19)     |
| CAPITAL BOW        |               | 0.017<br>(0.72)      | 0.018<br>(0.80)      | -0.007<br>(-1.44)   | -0.008<br>(-1.62)   |
| GOAL               |               |                      |                      | 1.009***<br>(63.18) | 1.013***<br>(59.71) |
| VALUATION          |               |                      |                      | 0.012<br>(0.66)     | 0.012<br>(0.65)     |
| DELIVERY MODE      | Fixed effects | Yes                  | Yes                  | Yes                 | Yes                 |
| PRODUCT TYPE       | Fixed effects | Yes                  | Yes                  | Yes                 | Yes                 |
| SEIS/EIS           | Fixed effects | Yes                  | Yes                  | Yes                 | Yes                 |
| SECTOR             | Fixed effects | Yes                  | Yes                  | Yes                 | Yes                 |
| QUARTER            | Fixed effects | Yes                  | Yes                  | Yes                 | Yes                 |
| N                  |               | 328                  | 328                  | 328                 | 328                 |
| Adjusted R-squared |               | 0.357                | 0.357                | 0.952               | 0.953               |

Table A15. Adding currency indicator

**Panel A - Table A15. Funding Goal with currency indicator**

|                    |     | Funding Goal        |                     |                     |                    |
|--------------------|-----|---------------------|---------------------|---------------------|--------------------|
|                    |     | Continuous model    | Dummy model         | Continuous model    | Dummy model        |
| FEMALES            | (%) | -0.346**<br>(-2.51) |                     | -0.635**<br>(-2.88) |                    |
| ALL-FEMALE         | (D) |                     | -0.268*<br>(-1.73)  |                     | -0.468*<br>(-1.87) |
| MIXED-GENDER       | (D) |                     | -0.274**<br>(-2.05) |                     | -0.422*<br>(-1.69) |
| GPT VARIABLES      |     | No                  | No                  | Yes                 | Yes                |
| CURRENCY INDICATOR |     | Yes                 | Yes                 | Yes                 | Yes                |
| ALL OTHER CONTROLS |     | Yes                 | Yes                 | Yes                 | Yes                |
| N                  |     | 767                 | 767                 | 329                 | 329                |
| Adjusted R-squared |     | 0.344               | 0.346               | 0.338               | 0.342              |

**Panel B - Table A15. Campaign success with currency indicator**

|                    |     | Campaign success  |                   |                     |                     |
|--------------------|-----|-------------------|-------------------|---------------------|---------------------|
|                    |     | Total effect      |                   | Direct effect       |                     |
|                    |     | Continuous model  | Dummy model       | Continuous model    | Dummy model         |
| FEMALES            | (%) | -0.152<br>(-0.90) |                   | -0.221<br>(-1.30)   |                     |
| ALL-FEMALE         | (D) |                   | -0.136<br>(-0.71) |                     | -0.181<br>(-0.96)   |
| MIXED-GENDER       | (D) |                   | -0.079<br>(-0.51) |                     | -0.144<br>(-0.92)   |
| GOAL               |     |                   |                   | -0.174**<br>(-2.79) | -0.174**<br>(-2.75) |
| VALUATION          |     |                   |                   | -0.067<br>(-1.02)   | -0.065<br>(-0.97)   |
| CURRENCY INDICATOR |     | Yes               | Yes               | Yes                 | Yes                 |
| ALL OTHER CONTROLS |     | Yes               | Yes               | Yes                 | Yes                 |
| N                  |     | 767               | 767               | 767                 | 767                 |

**Panel C - Table A15. Funding Received with currency indicator**

|                    |     | Funding Received    |                     |                     |                     |
|--------------------|-----|---------------------|---------------------|---------------------|---------------------|
|                    |     | Total effect        |                     | Direct effect       |                     |
|                    |     | Continuous model    | Dummy model         | Continuous model    | Dummy model         |
| FEMALES            | (%) | -0.737**<br>(-3.30) |                     | -0.094<br>(-1.53)   |                     |
| ALL-FEMALE         | (D) |                     | -0.665**<br>(-2.67) |                     | -0.189**<br>(-3.03) |
| MIXED-GENDER       | (D) |                     | -0.333<br>(-1.25)   |                     | 0.094*<br>(1.70)    |
| GOAL               |     |                     |                     | 1.009***<br>(60.84) | 1.012***<br>(56.93) |
| VALUATION          |     |                     |                     | 0.012<br>(0.68)     | 0.011<br>(0.62)     |
| CURRENCY INDICATOR |     | Yes                 | Yes                 | Yes                 | Yes                 |
| ALL OTHER CONTROLS |     | Yes                 | Yes                 | Yes                 | Yes                 |
| N                  |     | 329                 | 329                 | 329                 | 329                 |
| Adjusted R-squared |     | 0.339               | 0.340               | 0.952               | 0.953               |

Table A16. Adding rejected amounts

|                    |               | Funding Received     |                      |                     |                     |
|--------------------|---------------|----------------------|----------------------|---------------------|---------------------|
|                    |               | Total effect         |                      | Direct effect       |                     |
|                    |               | Continuous model     | Dummy model          | Continuous model    | Dummy model         |
| FEMALES            | (%)           | -0.713***<br>(-3.35) |                      | -0.104<br>(-1.60)   |                     |
| ALL-FEMALE         | (D)           |                      | -0.640**<br>(-2.73)  |                     | -0.192**<br>(-2.97) |
| MIXED-GENDER       | (D)           |                      | -0.328<br>(-1.24)    |                     | 0.080<br>(1.30)     |
| ENT. EXP.          | (%, D)        | 0.429*<br>(1.93)     | 0.287*<br>(1.69)     | -0.054<br>(-0.90)   | -0.050<br>(-1.00)   |
| MAN. EXP.          | (%, D)        | 0.040<br>(0.18)      | 0.321<br>(1.27)      | 0.015<br>(0.27)     | 0.061<br>(1.05)     |
| EDUCATION          | (%, D)        | 0.518<br>(1.51)      | 0.355<br>(1.63)      | 0.024<br>(0.29)     | -0.007<br>(-0.12)   |
| TEAM SIZE          |               | 0.137*<br>(1.77)     | 0.111<br>(1.24)      | 0.070<br>(0.88)     | -0.060**<br>(-2.68) |
| PRIOR SEEDRS       |               | -0.853***<br>(-6.16) | -0.855***<br>(-6.17) | 0.090<br>(1.13)     | 0.047<br>(1.12)     |
| GOAL               |               |                      |                      | 0.990***<br>(38.96) | 0.991***<br>(37.03) |
| VALUATION          |               |                      |                      | 0.006<br>(0.34)     | 0.005<br>(0.25)     |
| GPT SCORES         |               | Yes                  | Yes                  | Yes                 | Yes                 |
| DELIVERY MODE      | Fixed effects | Yes                  | Yes                  | Yes                 | Yes                 |
| PRODUCT TYPE       | Fixed effects | Yes                  | Yes                  | Yes                 | Yes                 |
| SEIS/EIS           | Fixed effects | Yes                  | Yes                  | Yes                 | Yes                 |
| SECTOR             | Fixed effects | Yes                  | Yes                  | Yes                 | Yes                 |
| QUARTER            | Fixed effects | Yes                  | Yes                  | Yes                 | Yes                 |
| N                  |               | 329                  | 329                  | 329                 | 329                 |
| Adjusted R-squared |               | 0.343                | 0.346                | 0.937               | 0.938               |

Table A17. Oaxaca-Blinder Decomposition

Table A17. Oaxaca-Blinder Decomposition with Year Fixed Effects

|                                                  |               | Funding Received             |                              |                             |
|--------------------------------------------------|---------------|------------------------------|------------------------------|-----------------------------|
|                                                  |               | ALL FEMALE +<br>MIXED-GENDER | ALL FEMALE                   | MIXED-GENDER                |
| ALL-MALE                                         |               | 11.759***                    | 11.759***                    | 11.759***                   |
| FEMALE                                           |               | 11.257***                    | 11.040***                    | 11.389***                   |
| MALE/FEMALE GAP                                  |               | 0.502**                      | 0.720**                      | 0.370                       |
| <i>Contributions from gender differences in:</i> |               |                              |                              |                             |
| ENT. EXP.                                        | (D)           | -0.009<br>(-1.22)<br>-1.79%  | -0.007<br>(-0.76)<br>-0.97%  | -0.011<br>(-1.25)<br>-2.97% |
| MAN. EXP.                                        | (D)           | 0.003<br>(0.61)<br>0.60%     | 0.002<br>(0.41)<br>0.28%     | 0.002<br>(0.44)<br>0.54%    |
| EDUCATION                                        | (D)           | 0.000<br>(0.18)<br>0.00%     | 0.001<br>(0.39)<br>0.14%     | -0.000<br>(-0.01)<br>0.00%  |
| VALUATION                                        |               | 0.002<br>(0.62)<br>0.40%     | 0.005<br>(0.89)<br>0.69%     | 0.001<br>(0.35)<br>0.27%    |
| GOAL                                             |               | 0.489**<br>(2.38)<br>97.21%  | 0.633**<br>(2.54)<br>87.92%  | 0.401<br>(1.46)<br>108.38%  |
| TEAM SIZE                                        |               | 0.009<br>(1.09)<br>1.79%     | -0.031**<br>(-2.12)<br>6.37% | 0.056**<br>(2.34)<br>11.35% |
| GPT GROWTH                                       |               | 0.007<br>(1.05)<br>1.39%     | 0.017<br>(1.04)<br>3.39%     | 0.003<br>(0.66)<br>0.60%    |
| GPT CAPITAL                                      |               | 0.002<br>(0.65)<br>0.40%     | 0.005<br>(0.90)<br>1.00%     | 0.002<br>(0.30)<br>0.40%    |
| PRIOR SEEDRS, SEIS and EIS                       |               | -0.001<br>(-0.22)<br>-0.20%  | -0.002<br>(-0.23)<br>-0.40%  | -0.000<br>(-0.06)<br>0.00%  |
| SECTOR                                           | Fixed effects | -0.008<br>(-0.67)<br>-1.59%  | -0.025<br>(-1.06)<br>-4.98%  | 0.001<br>(0.07)<br>0.20%    |
| YEAR                                             | Fixed effects | 0.003<br>(0.25)<br>0.60%     | -0.003<br>(-0.19)<br>-0.60%  | 0.010<br>(0.67)<br>1.99%    |
| All included variables                           |               | 0.488**<br>(2.34)<br>98.01%  | 0.581**<br>(2.35)<br>58.30%  | 0.461<br>(1.62)<br>93.23%   |
| N                                                |               | 329                          | 278                          | 298                         |

## Theory Appendix

### Model derivation

In this model each entrepreneur faces an investment demand  $y = n\psi\lambda$ , where  $n$  is the number of investors investing in a given type of venture,  $\psi$  is the campaign signal investors receive from the entrepreneur, and  $\lambda$  is a commonly observed external signal that investors receive about the attractiveness of the venture.

We can think of  $n$  as a general shift parameter. For expositional convenience, we focus on the interpretation that  $n$  is the number of interested investors. In the last part of this proof, we explain how  $n$  can be related to gender and how it maps into our data.

Concerning  $\psi$ , we assume that investors treat the campaign goal, denoted by  $g$ , as a signal of the company's funding needs. Setting a higher goal sends a signal that the company needs more money, so investors respond to that signal. For tractability we use a constant elasticity specification  $\theta(g) = g^\gamma$  with  $\gamma \in (0,1)$ .

Concerning  $\lambda$ , we assume that it has a negative exponential distribution with expected value  $\mu$ , a density  $\omega(\lambda) = \frac{1}{\mu} e^{-\frac{\lambda}{\mu}}$  and a cumulative distribution  $\Omega(\lambda) = 1 - e^{-\frac{\lambda}{\mu}}$ .

A campaign is only successful if the goal has been achieved, i.e., if  $y \geq g$ . The expected amount of funds raised is denoted by  $F$  and the probability of campaign success by  $S$ . They are given by  $F = \int_{y=g}^{y=\infty} y(n, \psi, \lambda) d\Omega(\lambda)$  and  $S = \int_{y=g}^{y=\infty} d\Omega(\lambda)$ .

It is useful to apply some transformations of these integrals. For this we define  $\hat{\lambda}$  to satisfy  $n\psi\hat{\lambda} = g$ . We find an explicit function of  $\hat{\lambda}$  from  $ng^\gamma\hat{\lambda} = g \Leftrightarrow \hat{\lambda} = \frac{g^{1-\gamma}}{n}$ . With this we obtain

$F = \int_{\lambda=\hat{\lambda}}^{\lambda=\infty} n\psi \frac{\lambda}{\mu} e^{-\frac{\lambda}{\mu}} d\lambda$ . Note that a campaign is successful whenever  $\lambda \geq \hat{\lambda}$ , which thus happens with probability  $S = 1 - \Omega(\hat{\lambda}) = e^{-\frac{\hat{\lambda}}{\mu}}$ .

Next, we use the memoryless property of the exponential distribution which says  $E(\lambda|\lambda \geq \hat{\lambda}) =$

$$\frac{\int_{\lambda=\hat{\lambda}}^{\lambda=\infty} \frac{\lambda}{\mu} e^{-\frac{\lambda}{\mu}} d\lambda}{e^{-\frac{\hat{\lambda}}{\mu}}} = \mu + \hat{\lambda}. \text{ This implies } \int_{\lambda=\hat{\lambda}}^{\lambda=\infty} \frac{\lambda}{\mu} e^{-\frac{\lambda}{\mu}} d\lambda = (\mu + \hat{\lambda})e^{-\frac{\hat{\lambda}}{\mu}}$$

which we use in the above expression to get  $F = n\theta(\mu + \hat{\lambda})e^{-\frac{\hat{\lambda}}{\mu}}$ .

A risk-neutral entrepreneur chooses  $g$  to maximize  $F$ . Using  $n\psi = \frac{g^{1-\gamma}}{\hat{\lambda}} g^\gamma = \frac{g}{\hat{\lambda}}$  we can rewrite the above expression of  $F$  to obtain  $F = \frac{g}{\hat{\lambda}} (\mu + \hat{\lambda}) e^{-\frac{\hat{\lambda}}{\mu}}$ . Further using  $\hat{\lambda} = \frac{g^{1-\gamma}}{n}$

$\Leftrightarrow g = n^{\frac{1}{1-\gamma}} \hat{\lambda}^{\frac{1}{1-\gamma}}$  we obtain  $F = n^{\frac{1}{1-\gamma}} \hat{\lambda}^{\frac{\gamma}{1-\gamma}} (\mu + \hat{\lambda}) e^{-\frac{\hat{\lambda}}{\mu}}$ . Taking logs, we finally obtain

$$\log(F) = \frac{1}{1-\gamma} \log(n) + \frac{\gamma}{1-\gamma} \log(\hat{\lambda}) + \log(\mu + \hat{\lambda}) - \frac{\hat{\lambda}}{\mu}.$$

Maximizing  $F$  w.r.t.  $g$  is equivalent to maximizing  $\log(F)$  w.r.t.  $\hat{\lambda}$  (which is a function of  $g$ ).

The first order condition (FOC) is given by  $\frac{\gamma}{1-\gamma} \frac{1}{\hat{\lambda}} + \frac{1}{\mu + \hat{\lambda}} - \frac{1}{\mu} = 0$ . To verify the concavity of the objective function we verify the second order condition, which is given by  $-\frac{\gamma}{1-\gamma} \frac{1}{\hat{\lambda}^2} - \frac{1}{(\mu + \hat{\lambda})^2} < 0$ .

After standard transformations of the FOC, we obtain the following quadratic equation:

$$\hat{\lambda}^2 - \mu \frac{\gamma}{1-\gamma} \hat{\lambda} - \mu^2 \frac{\gamma}{1-\gamma} = 0.$$

Solving this for the positive root we obtain after transformations:

$$\hat{\lambda} = \frac{\mu}{2} \left( \frac{\gamma}{1-\gamma} + \sqrt{\left( \frac{\gamma}{1-\gamma} \right)^2 + 4 \frac{\gamma}{1-\gamma}} \right)$$

The optimal  $\hat{\lambda}$  thus only depends on  $\mu$  and  $\gamma$ , but not on  $n$ .

### **Benchmark propositions**

**Proposition 1: The optimal  $g$  is increasing in  $n$ .**

Proof: In equilibrium we have  $g = n^{\frac{1}{1-\gamma}} \hat{\lambda}^{\frac{1}{1-\gamma}}$ . The first term is increasing in  $n$  and the second term independent of  $n$ .

**Proposition 2: The probability of campaign success  $S$  is independent of  $n$ .**

Proof: In equilibrium we have  $S = e^{-\frac{\hat{\lambda}}{\mu}}$  which is independent of  $n$ .

**Proposition 3: The expected amount of funds raised  $F$  is increasing in  $n$ .**

Proof: In equilibrium we have  $F = n^{\frac{1}{1-\gamma}} \hat{\lambda}^{\frac{\gamma}{1-\gamma}} (\mu + \hat{\lambda}) e^{-\frac{\hat{\lambda}}{\mu}}$ . The first term is increasing in  $n$  and the remaining terms are independent of  $n$ .

**Proposition 4: The overfunding ratio is independent of  $n$ .**

Proof: Using  $F = \frac{g}{\lambda}(\mu + \hat{\lambda})e^{-\frac{\lambda}{\mu}}$  we can write the overfunding ratio as  $\frac{F}{g} = \frac{1}{\lambda}(\mu + \hat{\lambda})e^{-\frac{\lambda}{\mu}}$ . None of its terms depend on  $n$ .

**Linking the model to gender and data**

We now take a closer look at  $n$ , the number of available investors. If investors always invest the same amount, this is also total available funding. We consider gender issues and briefly explain the conditions under which assortive matching can lead to female entrepreneurs facing fewer interested investors.

Let  $i = F, M$  be the superscript to denote female and male entrepreneurs, and  $j = f, m$  the subscript to denote female and male investors. Let  $Q^F$  and  $Q^M$  be the total number of female and male entrepreneurs. Let  $P_j^i$  be the total number of investors of gender  $j$  that are interested in an entrepreneur of gender  $i$ . The total number of female investors is given by  $P_f = P_f^F + P_f^M$ , and similarly  $P_m = P_m^F + P_m^M$  for male investors. The average number of investors interested in a given female entrepreneur is  $n^F = \frac{P_f^F + P_m^F}{Q^F}$ ; similarly,  $n^M = \frac{P_f^M + P_m^M}{Q^M}$  for a given male entrepreneur.

There is less funding for female entrepreneurs whenever

$$n^F < n^M \Leftrightarrow \frac{P_f^F + P_m^F}{Q^F} < \frac{P_f^M + P_m^M}{Q^M}.$$

It is useful to define:

$$q = \frac{Q^F}{Q^M}, p = \frac{P_f}{P_m}, \pi_f^F = \frac{P_f^F}{P_f}, \text{ and } \pi_m^M = \frac{P_m^M}{P_m}.$$

which implies

$$P_f^F = \pi_f^F P_f, P_f^M = (1 - \pi_f^F) P_f, P_m^M = \pi_m^M P_m, \text{ and } P_m^F = (1 - \pi_m^M) P_m.$$

After standard transformations we find

$$n^F < n^M \Leftrightarrow \frac{n^F}{n^M} = \frac{\pi_f^F p + (1 - \pi_m^M) 1}{(1 - \pi_f^F) p + \pi_m^M q} < 1$$

The left-hand side expression is increasing in  $p$  and  $\pi_f^F$  and decreasing in  $q$  and  $\pi_m^M$ .

To see whether this condition holds in our data we consult the following Table:

|                                                             |         |       | ALL<br>CAMPAIGNS | ALL-MALE<br>CAMPAIGNS | FEMALE<br>CAMPAIGNS |
|-------------------------------------------------------------|---------|-------|------------------|-----------------------|---------------------|
| <i>Sample of Successful Campaigns</i>                       |         |       |                  |                       |                     |
| Fraction of campaigns with female founders                  | $Q$     | Count | 333              | 251                   | 82                  |
| Female/Male campaign founder gap                            | $q$     | Ratio | 0.327            |                       |                     |
| <i>Male and Female investors (ignoring unknown gender):</i> |         |       |                  |                       |                     |
| Total number of male investors investing in                 | $P_m$   | Count | 46,804           | 38,883                | 7,921               |
| Fraction of male investors investing in                     | $\pi_m$ | %     |                  | 83.1%                 | 16.9%               |
| Total number of female investors investing in               | $P_f$   | Count | 7,819            | 6,477                 | 1,342               |
| Fraction of female investors investing in                   | $\pi_f$ | %     |                  | 82.8%                 | 17.2%               |
| Total number of male and female investors investing in      | $P$     | Count | 54,623           | 45,360                | 9,263               |
| Fraction of investors that are male                         |         | %     | 85.7%            |                       |                     |
| Fraction of investors that are female                       |         | %     | 14.3%            |                       |                     |
| Female/Male investor ratio                                  | $p$     | Ratio | 0.167            |                       |                     |
| Average number of male and female investors for             | $n$     | Count | 164              | 181                   | 113                 |
| <i>All investors (Including Unknown Gender)</i>             |         |       |                  |                       |                     |
| Total number of unknown gender investors investing in       | $P_u$   | Count | 12,988           | 10,764                | 2,224               |
| Fraction of unknown gender investors investing in           | $\pi_u$ | %     |                  | 82.9%                 | 17.1%               |
| Total number of investors investing in                      |         | Count | 67,611           | 56,124                | 11,487              |

This table consolidates mixed-gender and all-female teams into one column called "female campaigns"; the "male campaigns" column represents all-male teams. From the table we note that  $p = 0.167$ ,  $q = 0.327$ ,  $\pi_f^F = 0.172$ ,  $\pi_m^M = 0.831$ ,  $(1 - \pi_m^M) = 0.169$ , and  $(1 - \pi_f^F) = 0.828$ , so that

$$\frac{n^F}{n^M} = \frac{\pi_f^F p + (1 - \pi_m^M) 1}{(1 - \pi_f^F) p + \pi_m^M q} = \frac{0.172 * 0.167 + 0.169}{0.828 * 0.167 + 0.831} \frac{1}{0.327} = 0.624 < 1$$

This suggests that in our data female entrepreneurs should expect fewer interested investors.

### **Model extension with differential market depth**

We briefly outline the model extension concerning differential market depth. Consider a slight modification of the model where investor demand can differ across different types of founders in the right tail, i.e., for high values of  $y$ . Specifically assume that the funding amount  $F$  has one additional term, so that

$$F = \int_{y=g}^{y=\infty} y(n, \psi, \lambda) d\Omega(\lambda) + \int_{\lambda=\lambda_0}^{\lambda=\infty} \varepsilon d\Omega(\lambda),$$

where  $\hat{\lambda} < \lambda_0 < \infty$ , and  $\varepsilon$  sufficiently small. The additional term can also be simplified as follows  $\int_{\lambda=\lambda_0}^{\lambda=\infty} \varepsilon d\Omega(\lambda) = \varepsilon(1 - \Omega(\lambda_0))$ , which is only a function of  $\lambda_0$  and  $\varepsilon$ , which are both new exogenous parameters.

The additional term characterizes what we call ‘market depth.’ This pertains to extra funding that only occurs in the right tail of the distribution, i.e., for sufficiently high values of  $\lambda$ , where  $y(\lambda)$  is well above the funding goal  $g$ . If  $\varepsilon > 0$  ( $\varepsilon < 0$ ) we say that the market has more (less) depth for that type of founder. The additional term does not depend on  $g$  and therefore has no effect on its first-order condition. It follows that Propositions 1 and 2 are not affected by it, i.e., neither  $g$  nor  $S$  are affected by  $\varepsilon$ . However, Propositions 3 and 4 are affected by  $\varepsilon$ , in the sense that higher values of  $\varepsilon$  increase total funding  $F$  and the overfunding ratio  $\frac{F}{g}$ .

In our empirical context we are specifically interested in female teams which we associate with lower values of  $n$  (relative to male teams). We now add an assumption that all-female teams have less market depth (i.e.,  $\varepsilon < 0$ ) and mixed-gender teams have more market depth (i.e.,  $\varepsilon > 0$ ). This assumption suffices to explain the empirical results in Table 5.

Concerning total funding  $F$ , the theory predicts that all-female teams have the lowest total funding (because  $\varepsilon < 0$ ), mixed-gender teams have a bit more (because  $\varepsilon > 0$ ), and all-male teams have the most (because of higher  $n$ ). Empirically, this is exactly what we find in column 2 of Table 5.

Concerning the overfunding ratio, the theory predicts that all-female teams have a lower ratio than all-male teams. To see this, recall from Proposition 4 that for  $\varepsilon = 0$  the ratio is the same, so for  $\varepsilon < 0$  it is lower. By the same logic, mixed-gender teams have a higher overfunding ratio. Empirically, this is exactly what we find in column 4 of Table 5.
